# Supplementary material
Source: publisher figshare collection journal article supplement (https://acs.figshare.com/ndownloader/files/4129747)
Supplement: Supplementary file 1 [file 4129747]

Supporting Information:

## Efficient Light Harvesting and Charge Collection of Dye-Sensitized Solar Cells with (001) Faceted Single Crystalline Anatase Nanoparticles

Feng Hao<sup>a</sup>, Xiao Wang<sup>a</sup>, Chen Zhou<sup>a</sup>, Xingjian Jiao<sup>a</sup>, Xin Li<sup>b</sup>, Jianbao Li<sup>a,c</sup>, Hong Lin<sup>a,\*</sup>

<sup>a</sup>State Key Laboratory of New Ceramics & Fine Processing, Department of Material Science and Engineering, Tsinghua University, Beijing 100084, PR China.

<sup>b</sup>Pen-Tung Sah Micro-Nano Technology Research Center, Xiamen University, Xiamen 361005, PR China

<sup>c</sup> College of Materials Science and Chemical Engineering, Hainan University, Haikou 570228, PR China.

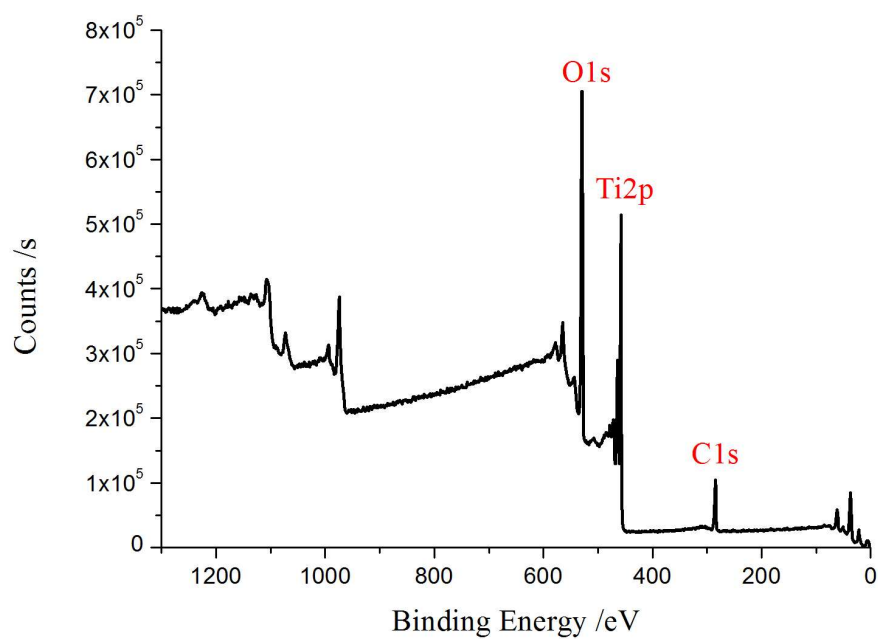

Figure S1 XPS spectrum of the as-synthesized  $\text{TiO}_2$  single crystals

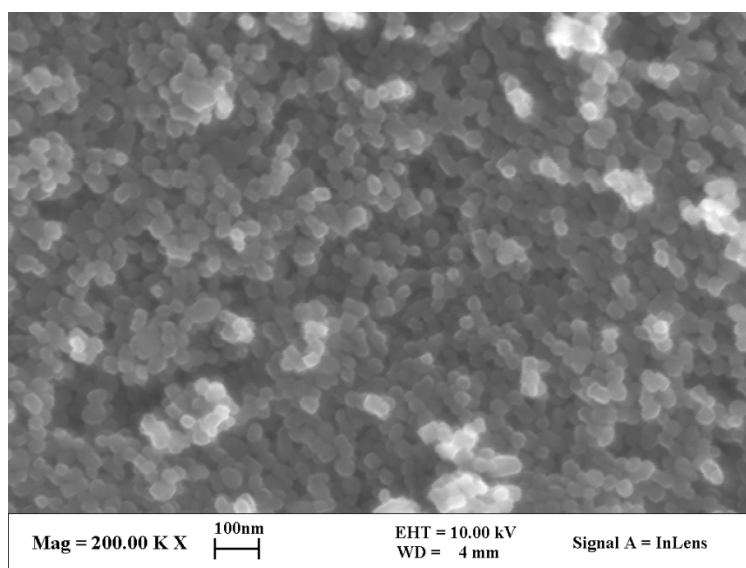

Figure S2 Representative SEM image of the  $\text{TiO}_2$  single crystals after thermal annealing

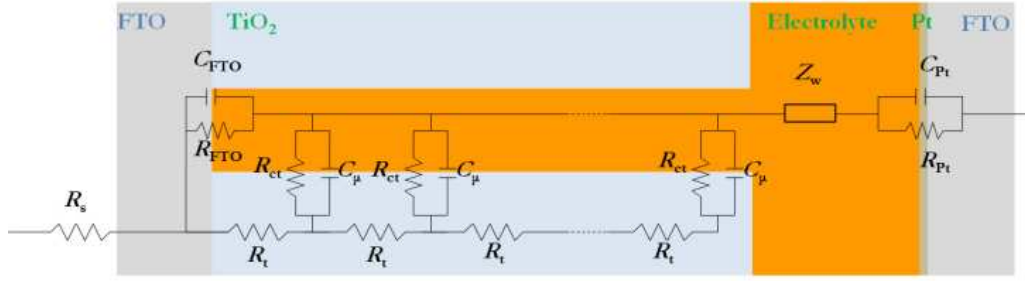

Figure S3 Transmission line model used to fit the impedance experimental data of DSCs.  $R_{ct}$ ,  $R_{Pt}$ , and  $R_{FTO}$ : charge-transfer resistance at the dyed  $\text{TiO}_2$ /electrolyte, the electrolyte/Pt interface, and the uncovered layer of FTO/electrolyte interface, respectively;  $C_{\mu}$ ,  $C_{Pt}$ , and  $C_{FTO}$ : the chemical capacitance at the dyed  $\text{TiO}_2$ /electrolyte, the electrolyte/Pt interface, and the uncovered layer of FTO/electrolyte interface, respectively;  $R_t$  is the transport resistance of the electrons in the  $\text{TiO}_2$  film;  $Z_w$  is the Warburg element showing the Nernst diffusion of  $\text{I}_3^-$  in the electrolyte;  $R_s$  is the series resistance, including the sheet resistance of the FTO glass and the contact resistance of the cells.

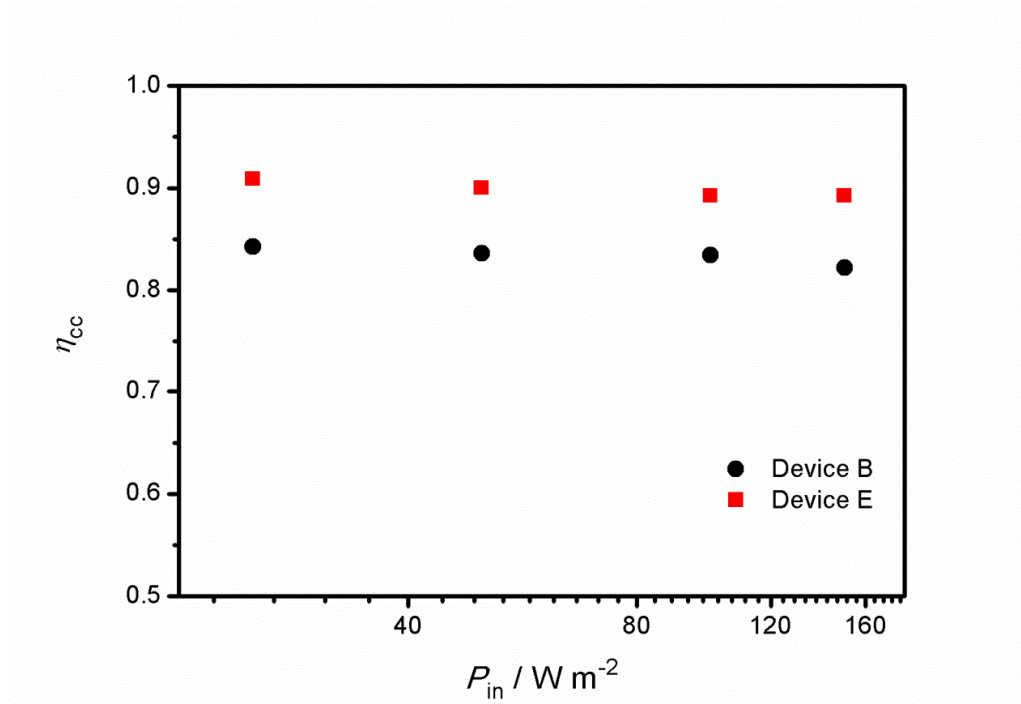

Figure S4 Derived charge collection efficiency against incident light intensities of device B and device E from IMPS/IMVS analysis.
